# Supplementary material for: Breast Cancer Subtypes Present a Differential Production of Reactive Oxygen Species (ROS) and Susceptibility to Antioxidant Treatment
Source: PubMed Central journal article supplement (PMC6568240; doi:10.3389/fonc.2019.00480), 2019-06-07

Supplementary Figure 2

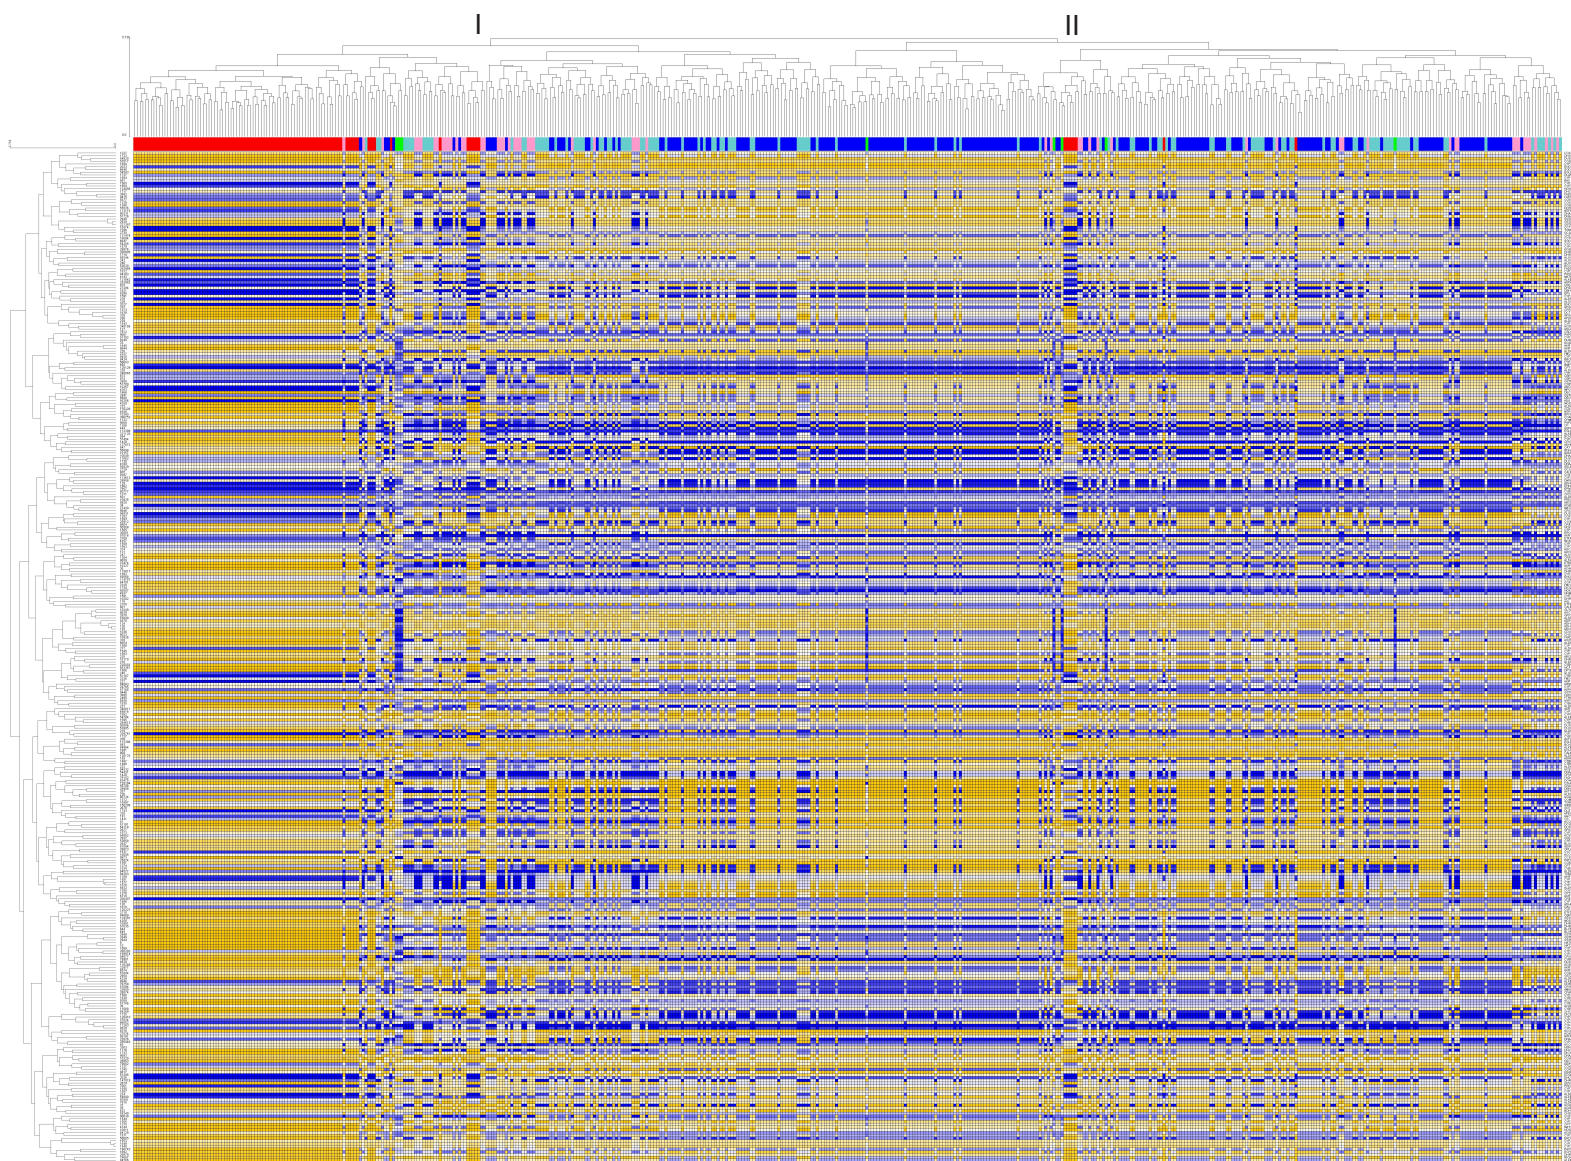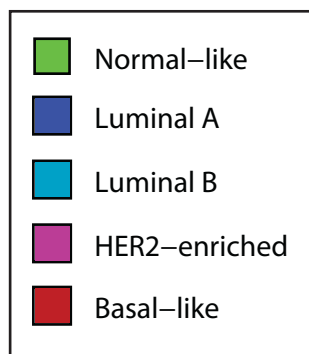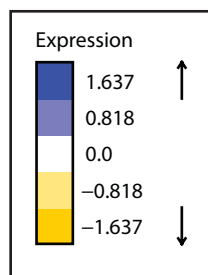

Supplement: Image_2.pdf [file Image_2.pdf]
