# Supplementary material for: Breast Cancer Subtypes Present a Differential Production of Reactive Oxygen Species (ROS) and Susceptibility to Antioxidant Treatment
Source: Front Oncol. 2019 Jun 7;9:480. doi: 10.3389/fonc.2019.00480 (PMC6568240; doi:10.3389/fonc.2019.00480)
Supplement: Supplementary file 6 [file Table_2.XLSX]

## Sheet: MITOCHONDRIAL GENES
OFFICIAL_GENE_SYMBOL	Name	Species
AIFM2	apoptosis inducing factor, mitochondria associated 2(AIFM2)	Homo sapiens
AIP	aryl hydrocarbon receptor interacting protein(AIP)	Homo sapiens
ARRDC3	arrestin domain containing 3(ARRDC3)	Homo sapiens
ASB1	ankyrin repeat and SOCS box containing 1(ASB1)	Homo sapiens
ATP5F1A	ATP synthase F1 subunit alpha	Homo sapiens
ATP5F1B	ATP synthase F1 subunit beta	Homo sapiens
ATP5F1C	ATP synthase F1 subunit gamma	Homo sapiens
ATP5MC1	ATP synthase membrane subunit c locus 1	Homo sapiens
ATP5MC2	ATP synthase membrane subunit c locus 2	Homo sapiens
ATP5MC3	ATP synthase membrane subunit c locus 3	Homo sapiens
ATP5ME	ATP synthase membrane subunit e	Homo sapiens
ATP5MF	ATP synthase membrane subunit f	Homo sapiens
ATP5MG	ATP synthase membrane subunit g	Homo sapiens
ATP5PB	ATP synthase peripheral stalk-membrane subunit b	Homo sapiens
ATP5PD	ATP synthase peripheral stalk subunit d	Homo sapiens
ATP5PF	ATP synthase peripheral stalk subunit F6	Homo sapiens
ATP5PO	ATP synthase peripheral stalk subunit OSCP	Homo sapiens
B2M	beta-2-microglobulin(B2M)	Homo sapiens
BAK1	BCL2 antagonist/killer 1(BAK1)	Homo sapiens
BBC3	BCL2 binding component 3(BBC3)	Homo sapiens
BCL2	BCL2, apoptosis regulator(BCL2)	Homo sapiens
BCL2L1	BCL2 like 1(BCL2L1)	Homo sapiens
BID	BH3 interacting domain death agonist(BID)	Homo sapiens
BNIP3	BCL2 interacting protein 3(BNIP3)	Homo sapiens
BNIP3L	BCL2 interacting protein 3 like(BNIP3L)	Homo sapiens
CDKN2A	cyclin dependent kinase inhibitor 2A(CDKN2A)	Homo sapiens
COX10	COX10, heme A:farnesyltransferase cytochrome c oxidase assembly factor(COX10)	Homo sapiens
COX18	COX18, cytochrome c oxidase assembly factor(COX18)	Homo sapiens
COX4I1	cytochrome c oxidase subunit 4I1(COX4I1)	Homo sapiens
COX5A	cytochrome c oxidase subunit 5A(COX5A)	Homo sapiens
COX5B	cytochrome c oxidase subunit 5B(COX5B)	Homo sapiens
COX6A1	cytochrome c oxidase subunit 6A1(COX6A1)	Homo sapiens
COX6A2	cytochrome c oxidase subunit 6A2(COX6A2)	Homo sapiens
COX6B1	cytochrome c oxidase subunit 6B1(COX6B1)	Homo sapiens
COX6C	cytochrome c oxidase subunit 6C(COX6C)	Homo sapiens
COX7A2	cytochrome c oxidase subunit 7A2(COX7A2)	Homo sapiens
COX7A2L	cytochrome c oxidase subunit 7A2 like(COX7A2L)	Homo sapiens
COX8A	cytochrome c oxidase subunit 8A(COX8A)	Homo sapiens
CPT1B	carnitine palmitoyltransferase 1B(CPT1B)	Homo sapiens
CPT2	carnitine palmitoyltransferase 2(CPT2)	Homo sapiens
CYB561D1	cytochrome b561 family member D1(CYB561D1)	Homo sapiens
CYC1	cytochrome c1(CYC1)	Homo sapiens
DNAJB1	DnaJ heat shock protein family (Hsp40) member B1(DNAJB1)	Homo sapiens
DNM1L	dynamin 1 like(DNM1L)	Homo sapiens
EDN1	endothelin 1(EDN1)	Homo sapiens
FIS1	fission, mitochondrial 1(FIS1)	Homo sapiens
GADD45B	growth arrest and DNA damage inducible beta(GADD45B)	Homo sapiens
GAPDH	glyceraldehyde-3-phosphate dehydrogenase(GAPDH)	Homo sapiens
GRPEL1	GrpE like 1, mitochondrial(GRPEL1)	Homo sapiens
HSP90AA1	heat shock protein 90 alpha family class A member 1(HSP90AA1)	Homo sapiens
HSPA1A	heat shock protein family A (Hsp70) member 1A(HSPA1A)	Homo sapiens
HSPD1	heat shock protein family D (Hsp60) member 1(HSPD1)	Homo sapiens
IMMP1L	inner mitochondrial membrane peptidase subunit 1(IMMP1L)	Homo sapiens
IMMP2L	inner mitochondrial membrane peptidase subunit 2(IMMP2L)	Homo sapiens
LRP5L	LDL receptor related protein 5 like(LRP5L)	Homo sapiens
LRPPRC	leucine rich pentatricopeptide repeat containing(LRPPRC)	Homo sapiens
MFN1	mitofusin 1(MFN1)	Homo sapiens
MFN2	mitofusin 2(MFN2)	Homo sapiens
MIEF1	mitochondrial elongation factor 1(MIEF1)	Homo sapiens
MARCH5	membrane associated ring-CH-type finger 5	Homo sapiens
MIEF2	mitochondrial elongation factor 2(MIEF2)	Homo sapiens
MIPEP	mitochondrial intermediate peptidase(MIPEP)	Homo sapiens
MPV17	MPV17, mitochondrial inner membrane protein(MPV17)	Homo sapiens
MSTO1	misato 1, mitochondrial distribution and morphology regulator(MSTO1)	Homo sapiens
MTX2	metaxin 2(MTX2)	Homo sapiens
NDUFA10	NADH:ubiquinone oxidoreductase subunit A10(NDUFA10)	Homo sapiens
NDUFA11	NADH:ubiquinone oxidoreductase subunit A11(NDUFA11)	Homo sapiens
NDUFA2	NADH:ubiquinone oxidoreductase subunit A2(NDUFA2)	Homo sapiens
NDUFA3	NADH:ubiquinone oxidoreductase subunit A3(NDUFA3)	Homo sapiens
NDUFA4	NDUFA4, mitochondrial complex associated(NDUFA4)	Homo sapiens
NDUFA5	NADH:ubiquinone oxidoreductase subunit A5(NDUFA5)	Homo sapiens
NDUFA6	NADH:ubiquinone oxidoreductase subunit A6(NDUFA6)	Homo sapiens
NDUFA8	NADH:ubiquinone oxidoreductase subunit A8(NDUFA8)	Homo sapiens
NDUFAB1	NADH:ubiquinone oxidoreductase subunit AB1(NDUFAB1)	Homo sapiens
NDUFB10	NADH:ubiquinone oxidoreductase subunit B10(NDUFB10)	Homo sapiens
NDUFB2	NADH:ubiquinone oxidoreductase subunit B2(NDUFB2)	Homo sapiens
NDUFB3	NADH:ubiquinone oxidoreductase subunit B3(NDUFB3)	Homo sapiens
NDUFB4	NADH:ubiquinone oxidoreductase subunit B4(NDUFB4)	Homo sapiens
NDUFB5	NADH:ubiquinone oxidoreductase subunit B5(NDUFB5)	Homo sapiens
NDUFB6	NADH:ubiquinone oxidoreductase subunit B6(NDUFB6)	Homo sapiens
NDUFB7	NADH:ubiquinone oxidoreductase subunit B7(NDUFB7)	Homo sapiens
NDUFB8	NADH:ubiquinone oxidoreductase subunit B8(NDUFB8)	Homo sapiens
NDUFB9	NADH:ubiquinone oxidoreductase subunit B9(NDUFB9)	Homo sapiens
NDUFC1	NADH:ubiquinone oxidoreductase subunit C1(NDUFC1)	Homo sapiens
NDUFC2	NADH:ubiquinone oxidoreductase subunit C2(NDUFC2)	Homo sapiens
NDUFS1	NADH:ubiquinone oxidoreductase core subunit S1(NDUFS1)	Homo sapiens
NDUFS2	NADH:ubiquinone oxidoreductase core subunit S2(NDUFS2)	Homo sapiens
NDUFS3	NADH:ubiquinone oxidoreductase core subunit S3(NDUFS3)	Homo sapiens
NDUFS4	NADH:ubiquinone oxidoreductase subunit S4(NDUFS4)	Homo sapiens
NDUFS5	NADH:ubiquinone oxidoreductase subunit S5(NDUFS5)	Homo sapiens
NDUFS6	NADH:ubiquinone oxidoreductase subunit S6(NDUFS6)	Homo sapiens
NDUFS7	NADH:ubiquinone oxidoreductase core subunit S7(NDUFS7)	Homo sapiens
NDUFS8	NADH:ubiquinone oxidoreductase core subunit S8(NDUFS8)	Homo sapiens
NDUFV1	NADH:ubiquinone oxidoreductase core subunit V1(NDUFV1)	Homo sapiens
NDUFV2	NADH:ubiquinone oxidoreductase core subunit V2(NDUFV2)	Homo sapiens
NDUFV3	NADH:ubiquinone oxidoreductase subunit V3(NDUFV3)	Homo sapiens
NEFL	neurofilament, light polypeptide(NEFL)	Homo sapiens
OMA1	OMA1 zinc metallopeptidase(OMA1)	Homo sapiens
OPA1	OPA1, mitochondrial dynamin like GTPase(OPA1)	Homo sapiens
PINK1	PTEN induced putative kinase 1(PINK1)	Homo sapiens
PMAIP1	phorbol-12-myristate-13-acetate-induced protein 1(PMAIP1)	Homo sapiens
PPA1	pyrophosphatase (inorganic) 1(PPA1)	Homo sapiens
PPARGC1A	PPARG coactivator 1 alpha(PPARGC1A)	Homo sapiens
PPARGC1B	PPARG coactivator 1 beta(PPARGC1B)	Homo sapiens
PRKN	parkin RBR E3 ubiquitin protein ligase	Homo sapiens
RHOT1	ras homolog family member T1(RHOT1)	Homo sapiens
RHOT2	ras homolog family member T2(RHOT2)	Homo sapiens
RPLP0	ribosomal protein lateral stalk subunit P0(RPLP0)	Homo sapiens
SDHA	succinate dehydrogenase complex flavoprotein subunit A(SDHA)	Homo sapiens
SDHB	succinate dehydrogenase complex iron sulfur subunit B(SDHB)	Homo sapiens
SDHC	succinate dehydrogenase complex subunit C(SDHC)	Homo sapiens
SDHD	succinate dehydrogenase complex subunit D(SDHD)	Homo sapiens
SFN	stratifin(SFN)	Homo sapiens
SH3GLB1	SH3 domain containing GRB2 like endophilin B1(SH3GLB1)	Homo sapiens
SIRT3	sirtuin 3(SIRT3)	Homo sapiens
SLC25A1	solute carrier family 25 member 1(SLC25A1)	Homo sapiens
SLC25A10	solute carrier family 25 member 10(SLC25A10)	Homo sapiens
SLC25A12	solute carrier family 25 member 12(SLC25A12)	Homo sapiens
SLC25A13	solute carrier family 25 member 13(SLC25A13)	Homo sapiens
SLC25A15	solute carrier family 25 member 15(SLC25A15)	Homo sapiens
SLC25A16	solute carrier family 25 member 16(SLC25A16)	Homo sapiens
SLC25A17	solute carrier family 25 member 17(SLC25A17)	Homo sapiens
SLC25A19	solute carrier family 25 member 19(SLC25A19)	Homo sapiens
SLC25A2	solute carrier family 25 member 2(SLC25A2)	Homo sapiens
SLC25A20	solute carrier family 25 member 20(SLC25A20)	Homo sapiens
SLC25A21	solute carrier family 25 member 21(SLC25A21)	Homo sapiens
SLC25A22	solute carrier family 25 member 22(SLC25A22)	Homo sapiens
SLC25A23	solute carrier family 25 member 23(SLC25A23)	Homo sapiens
SLC25A24	solute carrier family 25 member 24(SLC25A24)	Homo sapiens
SLC25A25	solute carrier family 25 member 25(SLC25A25)	Homo sapiens
SLC25A27	solute carrier family 25 member 27(SLC25A27)	Homo sapiens
SLC25A3	solute carrier family 25 member 3(SLC25A3)	Homo sapiens
SLC25A30	solute carrier family 25 member 30(SLC25A30)	Homo sapiens
SLC25A31	solute carrier family 25 member 31(SLC25A31)	Homo sapiens
SLC25A37	solute carrier family 25 member 37(SLC25A37)	Homo sapiens
SLC25A4	solute carrier family 25 member 4(SLC25A4)	Homo sapiens
SOD1	superoxide dismutase 1, soluble(SOD1)	Homo sapiens
SOD2	superoxide dismutase 2, mitochondrial(SOD2)	Homo sapiens
STARD3	StAR related lipid transfer domain containing 3(STARD3)	Homo sapiens
SYTL2	synaptotagmin like 2(SYTL2)	Homo sapiens
TIMM10	translocase of inner mitochondrial membrane 10(TIMM10)	Homo sapiens
TIMM10B	translocase of inner mitochondrial membrane 10B(TIMM10B)	Homo sapiens
TIMM17A	translocase of inner mitochondrial membrane 17 homolog A (yeast)(TIMM17A)	Homo sapiens
TIMM22	translocase of inner mitochondrial membrane 22(TIMM22)	Homo sapiens
TIMM23	translocase of inner mitochondrial membrane 23(TIMM23)	Homo sapiens
TIMM44	translocase of inner mitochondrial membrane 44(TIMM44)	Homo sapiens
TIMM50	translocase of inner mitochondrial membrane 50(TIMM50)	Homo sapiens
TIMM8B	translocase of inner mitochondrial membrane 8 homolog B(TIMM8B)	Homo sapiens
TIMM9	translocase of inner mitochondrial membrane 9(TIMM9)	Homo sapiens
TOMM20	translocase of outer mitochondrial membrane 20(TOMM20)	Homo sapiens
TOMM22	translocase of outer mitochondrial membrane 22(TOMM22)	Homo sapiens
TOMM34	translocase of outer mitochondrial membrane 34(TOMM34)	Homo sapiens
TOMM40	translocase of outer mitochondrial membrane 40(TOMM40)	Homo sapiens
TOMM40L	translocase of outer mitochondrial membrane 40 like(TOMM40L)	Homo sapiens
TOMM70	translocase of outer mitochondrial membrane 70(TOMM70)	Homo sapiens
TP53	tumor protein p53(TP53)	Homo sapiens
TSPO	translocator protein(TSPO)	Homo sapiens
UCP1	uncoupling protein 1(UCP1)	Homo sapiens
UCP2	uncoupling protein 2(UCP2)	Homo sapiens
UCP3	uncoupling protein 3(UCP3)	Homo sapiens
UQCRC1	ubiquinol-cytochrome c reductase core protein I(UQCRC1)	Homo sapiens
UQCRC2	ubiquinol-cytochrome c reductase core protein II(UQCRC2)	Homo sapiens
UQCRFS1	ubiquinol-cytochrome c reductase, Rieske iron-sulfur polypeptide 1(UQCRFS1)	Homo sapiens
UQCRH	ubiquinol-cytochrome c reductase hinge protein(UQCRH)	Homo sapiens
UQCRQ	ubiquinol-cytochrome c reductase complex III subunit VII(UQCRQ)	Homo sapiens
YME1L1	YME1 like 1 ATPase(YME1L1)	Homo sapiens

## Sheet: ROS GENES
OFFICIAL_GENE_SYMBOL	Name	Species
AASS	aminoadipate-semialdehyde synthase(AASS)	Homo sapiens
ABCC4	ATP binding cassette subfamily C member 4(ABCC4)	Homo sapiens
ABCD2	ATP binding cassette subfamily D member 2(ABCD2)	Homo sapiens
ABCD3	ATP binding cassette subfamily D member 3(ABCD3)	Homo sapiens
ACAA1	acetyl-CoA acyltransferase 1(ACAA1)	Homo sapiens
ACAD10	acyl-CoA dehydrogenase family member 10(ACAD10)	Homo sapiens
ACAD11	acyl-CoA dehydrogenase family member 11(ACAD11)	Homo sapiens
ACAD8	acyl-CoA dehydrogenase family member 8(ACAD8)	Homo sapiens
ACAD9	acyl-CoA dehydrogenase family member 9(ACAD9)	Homo sapiens
ACADL	acyl-CoA dehydrogenase, long chain(ACADL)	Homo sapiens
ACADM	acyl-CoA dehydrogenase, C-4 to C-12 straight chain(ACADM)	Homo sapiens
ACADS	acyl-CoA dehydrogenase, C-2 to C-3 short chain(ACADS)	Homo sapiens
ACADSB	acyl-CoA dehydrogenase, short/branched chain(ACADSB)	Homo sapiens
ACADVL	acyl-CoA dehydrogenase, very long chain(ACADVL)	Homo sapiens
ACO1	aconitase 1(ACO1)	Homo sapiens
ACOT8	acyl-CoA thioesterase 8(ACOT8)	Homo sapiens
ACOX1	acyl-CoA oxidase 1(ACOX1)	Homo sapiens
ACOX2	acyl-CoA oxidase 2(ACOX2)	Homo sapiens
ACOX3	acyl-CoA oxidase 3, pristanoyl(ACOX3)	Homo sapiens
ACSM1	acyl-CoA synthetase medium-chain family member 1(ACSM1)	Homo sapiens
ACSM2B	acyl-CoA synthetase medium-chain family member 2B(ACSM2B)	Homo sapiens
ACSS1	acyl-CoA synthetase short-chain family member 1(ACSS1)	Homo sapiens
ACSS2	acyl-CoA synthetase short-chain family member 2(ACSS2)	Homo sapiens
ADH1A	alcohol dehydrogenase 1A (class I), alpha polypeptide(ADH1A)	Homo sapiens
ADH1B	alcohol dehydrogenase 1B (class I), beta polypeptide(ADH1B)	Homo sapiens
ADH1C	alcohol dehydrogenase 1C (class I), gamma polypeptide(ADH1C)	Homo sapiens
ADH4	alcohol dehydrogenase 4 (class II), pi polypeptide(ADH4)	Homo sapiens
ADH5	alcohol dehydrogenase 5 (class III), chi polypeptide(ADH5)	Homo sapiens
ADH6	alcohol dehydrogenase 6 (class V)(ADH6)	Homo sapiens
ADH7	alcohol dehydrogenase 7 (class IV), mu or sigma polypeptide(ADH7)	Homo sapiens
ADHFE1	alcohol dehydrogenase, iron containing 1(ADHFE1)	Homo sapiens
ADI1	acireductone dioxygenase 1(ADI1)	Homo sapiens
ADIPOQ	adiponectin, C1Q and collagen domain containing(ADIPOQ)	Homo sapiens
ADIPOR1	adiponectin receptor 1(ADIPOR1)	Homo sapiens
ADIPOR2	adiponectin receptor 2(ADIPOR2)	Homo sapiens
ADRB3	adrenoceptor beta 3(ADRB3)	Homo sapiens
AGL	amylo-alpha-1, 6-glucosidase, 4-alpha-glucanotransferase(AGL)	Homo sapiens
AGPS	alkylglycerone phosphate synthase(AGPS)	Homo sapiens
AHCY	adenosylhomocysteinase(AHCY)	Homo sapiens
AIFM2	apoptosis inducing factor, mitochondria associated 2(AIFM2)	Homo sapiens
AIFM3	apoptosis inducing factor, mitochondria associated 3(AIFM3)	Homo sapiens
AKR1A1	aldo-keto reductase family 1 member A1(AKR1A1)	Homo sapiens
AKR1B1	aldo-keto reductase family 1 member B(AKR1B1)	Homo sapiens
AKR1B10	aldo-keto reductase family 1 member B10(AKR1B10)	Homo sapiens
AKR1C1	aldo-keto reductase family 1 member C1(AKR1C1)	Homo sapiens
AKR1C3	aldo-keto reductase family 1 member C3(AKR1C3)	Homo sapiens
AKR1C4	aldo-keto reductase family 1 member C4(AKR1C4)	Homo sapiens
AKR1C8P	aldo-keto reductase family 1 member C8, pseudogene(AKR1C8P)	Homo sapiens
AKR1D1	aldo-keto reductase family 1 member D1(AKR1D1)	Homo sapiens
AKR7A2	aldo-keto reductase family 7 member A2(AKR7A2)	Homo sapiens
AKR7A3	aldo-keto reductase family 7 member A3(AKR7A3)	Homo sapiens
AKT1	AKT serine/threonine kinase 1(AKT1)	Homo sapiens
AKT2	AKT serine/threonine kinase 2(AKT2)	Homo sapiens
ALDH16A1	aldehyde dehydrogenase 16 family member A1(ALDH16A1)	Homo sapiens
ALDH18A1	aldehyde dehydrogenase 18 family member A1(ALDH18A1)	Homo sapiens
ALDH1A1	aldehyde dehydrogenase 1 family member A1(ALDH1A1)	Homo sapiens
ALDH1A2	aldehyde dehydrogenase 1 family member A2(ALDH1A2)	Homo sapiens
ALDH1A3	aldehyde dehydrogenase 1 family member A3(ALDH1A3)	Homo sapiens
ALDH1B1	aldehyde dehydrogenase 1 family member B1(ALDH1B1)	Homo sapiens
ALDH1L1	aldehyde dehydrogenase 1 family member L1(ALDH1L1)	Homo sapiens
ALDH2	aldehyde dehydrogenase 2 family (mitochondrial)(ALDH2)	Homo sapiens
ALDH3A1	aldehyde dehydrogenase 3 family member A1(ALDH3A1)	Homo sapiens
ALDH3A2	aldehyde dehydrogenase 3 family member A2(ALDH3A2)	Homo sapiens
ALDH3B1	aldehyde dehydrogenase 3 family member B1(ALDH3B1)	Homo sapiens
ALDH3B2	aldehyde dehydrogenase 3 family member B2(ALDH3B2)	Homo sapiens
ALDH4A1	aldehyde dehydrogenase 4 family member A1(ALDH4A1)	Homo sapiens
ALDH5A1	aldehyde dehydrogenase 5 family member A1(ALDH5A1)	Homo sapiens
ALDH6A1	aldehyde dehydrogenase 6 family member A1(ALDH6A1)	Homo sapiens
ALDH7A1	aldehyde dehydrogenase 7 family member A1(ALDH7A1)	Homo sapiens
ALDH8A1	aldehyde dehydrogenase 8 family member A1(ALDH8A1)	Homo sapiens
ALDH9A1	aldehyde dehydrogenase 9 family member A1(ALDH9A1)	Homo sapiens
ALDOA	aldolase, fructose-bisphosphate A(ALDOA)	Homo sapiens
ALDOB	aldolase, fructose-bisphosphate B(ALDOB)	Homo sapiens
ALDOC	aldolase, fructose-bisphosphate C(ALDOC)	Homo sapiens
ALKBH1	alkB homolog 1, histone H2A dioxygenase(ALKBH1)	Homo sapiens
ALKBH2	alkB homolog 2, alpha-ketoglutarate dependent dioxygenase(ALKBH2)	Homo sapiens
ALKBH3	alkB homolog 3, alpha-ketoglutaratedependent dioxygenase(ALKBH3)	Homo sapiens
ALKBH4	alkB homolog 4, lysine demethylase(ALKBH4)	Homo sapiens
ALKBH5	alkB homolog 5, RNA demethylase(ALKBH5)	Homo sapiens
ALKBH6	alkB homolog 6(ALKBH6)	Homo sapiens
ALKBH7	alkB homolog 7(ALKBH7)	Homo sapiens
ALKBH8	alkB homolog 8, tRNA methyltransferase(ALKBH8)	Homo sapiens
ALOX12	arachidonate 12-lipoxygenase, 12S type(ALOX12)	Homo sapiens
ALOX12B	arachidonate 12-lipoxygenase, 12R type(ALOX12B)	Homo sapiens
ALOX15	arachidonate 15-lipoxygenase(ALOX15)	Homo sapiens
ALOX15B	arachidonate 15-lipoxygenase, type B(ALOX15B)	Homo sapiens
ALOX5	arachidonate 5-lipoxygenase(ALOX5)	Homo sapiens
ALOXE3	arachidonate lipoxygenase 3(ALOXE3)	Homo sapiens
AMACR	alpha-methylacyl-CoA racemase(AMACR)	Homo sapiens
AOC2	amine oxidase, copper containing 2(AOC2)	Homo sapiens
AOC3	amine oxidase, copper containing 3(AOC3)	Homo sapiens
AOX1	aldehyde oxidase 1(AOX1)	Homo sapiens
APEX1	apurinic/apyrimidinic endodeoxyribonuclease 1(APEX1)	Homo sapiens
APOA1	apolipoprotein A1(APOA1)	Homo sapiens
APOA2	apolipoprotein A2(APOA2)	Homo sapiens
APOA4	apolipoprotein A4(APOA4)	Homo sapiens
ASPH	aspartate beta-hydroxylase(ASPH)	Homo sapiens
ASPHD1	aspartate beta-hydroxylase domain containing 1(ASPHD1)	Homo sapiens
ASPHD2	aspartate beta-hydroxylase domain containing 2(ASPHD2)	Homo sapiens
BAX	BCL2 associated X, apoptosis regulator(BAX)	Homo sapiens
BBOX1	gamma-butyrobetaine hydroxylase 1(BBOX1)	Homo sapiens
BCKDHA	branched chain keto acid dehydrogenase E1, alpha polypeptide(BCKDHA)	Homo sapiens
BCKDHB	branched chain keto acid dehydrogenase E1 subunit beta(BCKDHB)	Homo sapiens
BCO1	beta-carotene oxygenase 1(BCO1)	Homo sapiens
BDH1	3-hydroxybutyrate dehydrogenase, type 1(BDH1)	Homo sapiens
BDH2	3-hydroxybutyrate dehydrogenase, type 2(BDH2)	Homo sapiens
BLOC1S1	biogenesis of lysosomal organelles complex 1 subunit 1(BLOC1S1)	Homo sapiens
BLVRA	biliverdin reductase A(BLVRA)	Homo sapiens
BLVRB	biliverdin reductase B(BLVRB)	Homo sapiens
BMP2	bone morphogenetic protein 2(BMP2)	Homo sapiens
BPNT1	3'(2'), 5'-bisphosphate nucleotidase 1(BPNT1)	Homo sapiens
C1ORF43	chromosome 1 open reading frame 43(C1orf43)	Homo sapiens
CALM1	calmodulin 1(CALM1)	Homo sapiens
CALM2	calmodulin 2(CALM2)	Homo sapiens
CALM3	calmodulin 3(CALM3)	Homo sapiens
CAT	catalase(CAT)	Homo sapiens
CBR1	carbonyl reductase 1(CBR1)	Homo sapiens
CBR3	carbonyl reductase 3(CBR3)	Homo sapiens
CBR4	carbonyl reductase 4(CBR4)	Homo sapiens
CBS	cystathionine-beta-synthase(CBS)	Homo sapiens
CCS	copper chaperone for superoxide dismutase(CCS)	Homo sapiens
CCT7	chaperonin containing TCP1 subunit 7(CCT7)	Homo sapiens
CCT8	chaperonin containing TCP1 subunit 8(CCT8)	Homo sapiens
CDO1	cysteine dioxygenase type 1(CDO1)	Homo sapiens
CFAP61	cilia and flagella associated protein 61(CFAP61)	Homo sapiens
CH25H	cholesterol 25-hydroxylase(CH25H)	Homo sapiens
CHCHD4	coiled-coil-helix-coiled-coil-helix domain containing 4(CHCHD4)	Homo sapiens
CHCHD5	coiled-coil-helix-coiled-coil-helix domain containing 5(CHCHD5)	Homo sapiens
CHDH	choline dehydrogenase(CHDH)	Homo sapiens
CHML	CHM like, Rab escort protein 2(CHML)	Homo sapiens
CNDP2	CNDP dipeptidase 2 (metallopeptidase M20 family)(CNDP2)	Homo sapiens
COA6	cytochrome c oxidase assembly factor 6(COA6)	Homo sapiens
COMT	catechol-O-methyltransferase(COMT)	Homo sapiens
COQ6	coenzyme Q6, monooxygenase(COQ6)	Homo sapiens
COQ7	coenzyme Q7, hydroxylase(COQ7)	Homo sapiens
COQ9	coenzyme Q9(COQ9)	Homo sapiens
COX10	COX10, heme A:farnesyltransferase cytochrome c oxidase assembly factor(COX10)	Homo sapiens
COX15	COX15, cytochrome c oxidase assembly homolog(COX15)	Homo sapiens
COX19	COX19, cytochrome c oxidase assembly factor(COX19)	Homo sapiens
COX20	COX20, cytochrome c oxidase assembly factor(COX20)	Homo sapiens
COX4I1	cytochrome c oxidase subunit 4I1(COX4I1)	Homo sapiens
COX4I2	cytochrome c oxidase subunit 4I2(COX4I2)	Homo sapiens
COX5A	cytochrome c oxidase subunit 5A(COX5A)	Homo sapiens
COX5B	cytochrome c oxidase subunit 5B(COX5B)	Homo sapiens
COX6A1	cytochrome c oxidase subunit 6A1(COX6A1)	Homo sapiens
COX6B1	cytochrome c oxidase subunit 6B1(COX6B1)	Homo sapiens
COX6C	cytochrome c oxidase subunit 6C(COX6C)	Homo sapiens
COX7A2L	cytochrome c oxidase subunit 7A2 like(COX7A2L)	Homo sapiens
COX7C	cytochrome c oxidase subunit 7C(COX7C)	Homo sapiens
COX8A	cytochrome c oxidase subunit 8A(COX8A)	Homo sapiens
CP	ceruloplasmin(CP)	Homo sapiens
CPOX	coproporphyrinogen oxidase(CPOX)	Homo sapiens
CPS1	carbamoyl-phosphate synthase 1(CPS1)	Homo sapiens
CPT1A	carnitine palmitoyltransferase 1A(CPT1A)	Homo sapiens
CPT1B	carnitine palmitoyltransferase 1B(CPT1B)	Homo sapiens
CPT1C	carnitine palmitoyltransferase 1C(CPT1C)	Homo sapiens
CPT2	carnitine palmitoyltransferase 2(CPT2)	Homo sapiens
CRAT	carnitine O-acetyltransferase(CRAT)	Homo sapiens
CREG1	cellular repressor of E1A stimulated genes 1(CREG1)	Homo sapiens
CREG2	cellular repressor of E1A stimulated genes 2(CREG2)	Homo sapiens
CROT	carnitine O-octanoyltransferase(CROT)	Homo sapiens
CRYL1	crystallin lambda 1(CRYL1)	Homo sapiens
CRYM	crystallin mu(CRYM)	Homo sapiens
CRYZ	crystallin zeta(CRYZ)	Homo sapiens
CRYZL1	crystallin zeta like 1(CRYZL1)	Homo sapiens
CS	citrate synthase(CS)	Homo sapiens
CSDE1	cold shock domain containing E1(CSDE1)	Homo sapiens
CTBP1	C-terminal binding protein 1(CTBP1)	Homo sapiens
CTBP2	C-terminal binding protein 2(CTBP2)	Homo sapiens
CYB561	cytochrome b561(CYB561)	Homo sapiens
CYB561A3	cytochrome b561 family member A3(CYB561A3)	Homo sapiens
CYB561D1	cytochrome b561 family member D1(CYB561D1)	Homo sapiens
CYB561D2	cytochrome b561 family member D2(CYB561D2)	Homo sapiens
CYB5A	cytochrome b5 type A(CYB5A)	Homo sapiens
CYB5B	cytochrome b5 type B(CYB5B)	Homo sapiens
CYB5R1	cytochrome b5 reductase 1(CYB5R1)	Homo sapiens
CYB5R2	cytochrome b5 reductase 2(CYB5R2)	Homo sapiens
CYB5R3	cytochrome b5 reductase 3(CYB5R3)	Homo sapiens
CYB5R4	cytochrome b5 reductase 4(CYB5R4)	Homo sapiens
CYBA	cytochrome b-245 alpha chain(CYBA)	Homo sapiens
CYBB	cytochrome b-245 beta chain	Homo sapiens
CYBRD1	cytochrome b reductase 1(CYBRD1)	Homo sapiens
CYC1	cytochrome c1(CYC1)	Homo sapiens
CYCS	cytochrome c, somatic(CYCS)	Homo sapiens
CYGB	cytoglobin(CYGB)	Homo sapiens
CYP11A1	cytochrome P450 family 11 subfamily A member 1(CYP11A1)	Homo sapiens
CYP11B1	cytochrome P450 family 11 subfamily B member 1(CYP11B1)	Homo sapiens
CYP11B2	cytochrome P450 family 11 subfamily B member 2(CYP11B2)	Homo sapiens
CYP17A1	cytochrome P450 family 17 subfamily A member 1(CYP17A1)	Homo sapiens
CYP19A1	cytochrome P450 family 19 subfamily A member 1(CYP19A1)	Homo sapiens
CYP1A1	cytochrome P450 family 1 subfamily A member 1(CYP1A1)	Homo sapiens
CYP1A2	cytochrome P450 family 1 subfamily A member 2(CYP1A2)	Homo sapiens
CYP1B1	cytochrome P450 family 1 subfamily B member 1(CYP1B1)	Homo sapiens
CYP20A1	cytochrome P450 family 20 subfamily A member 1(CYP20A1)	Homo sapiens
CYP21A2	cytochrome P450 family 21 subfamily A member 2(CYP21A2)	Homo sapiens
CYP24A1	cytochrome P450 family 24 subfamily A member 1(CYP24A1)	Homo sapiens
CYP26A1	cytochrome P450 family 26 subfamily A member 1(CYP26A1)	Homo sapiens
CYP26B1	cytochrome P450 family 26 subfamily B member 1(CYP26B1)	Homo sapiens
CYP26C1	cytochrome P450 family 26 subfamily C member 1(CYP26C1)	Homo sapiens
CYP27A1	cytochrome P450 family 27 subfamily A member 1(CYP27A1)	Homo sapiens
CYP27B1	cytochrome P450 family 27 subfamily B member 1(CYP27B1)	Homo sapiens
CYP27C1	cytochrome P450 family 27 subfamily C member 1(CYP27C1)	Homo sapiens
CYP2A13	cytochrome P450 family 2 subfamily A member 13(CYP2A13)	Homo sapiens
CYP2A6	cytochrome P450 family 2 subfamily A member 6(CYP2A6)	Homo sapiens
CYP2A7	cytochrome P450 family 2 subfamily A member 7(CYP2A7)	Homo sapiens
CYP2B6	cytochrome P450 family 2 subfamily B member 6(CYP2B6)	Homo sapiens
CYP2C18	cytochrome P450 family 2 subfamily C member 18(CYP2C18)	Homo sapiens
CYP2C19	cytochrome P450 family 2 subfamily C member 19(CYP2C19)	Homo sapiens
CYP2C8	cytochrome P450 family 2 subfamily C member 8(CYP2C8)	Homo sapiens
CYP2C9	cytochrome P450 family 2 subfamily C member 9(CYP2C9)	Homo sapiens
CYP2D6	cytochrome P450 family 2 subfamily D member 6(CYP2D6)	Homo sapiens
CYP2D7	cytochrome P450 family 2 subfamily D member 7 (gene/pseudogene)(CYP2D7)	Homo sapiens
CYP2E1	cytochrome P450 family 2 subfamily E member 1(CYP2E1)	Homo sapiens
CYP2F1	cytochrome P450 family 2 subfamily F member 1(CYP2F1)	Homo sapiens
CYP2J2	cytochrome P450 family 2 subfamily J member 2(CYP2J2)	Homo sapiens
CYP2R1	cytochrome P450 family 2 subfamily R member 1(CYP2R1)	Homo sapiens
CYP2S1	cytochrome P450 family 2 subfamily S member 1(CYP2S1)	Homo sapiens
CYP2U1	cytochrome P450 family 2 subfamily U member 1(CYP2U1)	Homo sapiens
CYP39A1	cytochrome P450 family 39 subfamily A member 1(CYP39A1)	Homo sapiens
CYP3A4	cytochrome P450 family 3 subfamily A member 4(CYP3A4)	Homo sapiens
CYP3A43	cytochrome P450 family 3 subfamily A member 43(CYP3A43)	Homo sapiens
CYP3A5	cytochrome P450 family 3 subfamily A member 5(CYP3A5)	Homo sapiens
CYP3A7	cytochrome P450 family 3 subfamily A member 7(CYP3A7)	Homo sapiens
CYP46A1	cytochrome P450 family 46 subfamily A member 1(CYP46A1)	Homo sapiens
CYP4A11	cytochrome P450 family 4 subfamily A member 11(CYP4A11)	Homo sapiens
CYP4B1	cytochrome P450 family 4 subfamily B member 1(CYP4B1)	Homo sapiens
CYP4F11	cytochrome P450 family 4 subfamily F member 11(CYP4F11)	Homo sapiens
CYP4F12	cytochrome P450 family 4 subfamily F member 12(CYP4F12)	Homo sapiens
CYP4F2	cytochrome P450 family 4 subfamily F member 2(CYP4F2)	Homo sapiens
CYP4F22	cytochrome P450 family 4 subfamily F member 22(CYP4F22)	Homo sapiens
CYP4F8	cytochrome P450 family 4 subfamily F member 8(CYP4F8)	Homo sapiens
CYP4V2	cytochrome P450 family 4 subfamily V member 2(CYP4V2)	Homo sapiens
CYP4X1	cytochrome P450 family 4 subfamily X member 1(CYP4X1)	Homo sapiens
CYP4Z1	cytochrome P450 family 4 subfamily Z member 1(CYP4Z1)	Homo sapiens
CYP51A1	cytochrome P450 family 51 subfamily A member 1(CYP51A1)	Homo sapiens
CYP7A1	cytochrome P450 family 7 subfamily A member 1(CYP7A1)	Homo sapiens
CYP7B1	cytochrome P450 family 7 subfamily B member 1(CYP7B1)	Homo sapiens
CYP8B1	cytochrome P450 family 8 subfamily B member 1(CYP8B1)	Homo sapiens
D2HGDH	D-2-hydroxyglutarate dehydrogenase(D2HGDH)	Homo sapiens
DAO	D-amino acid oxidase(DAO)	Homo sapiens
DBH	dopamine beta-hydroxylase(DBH)	Homo sapiens
DBNL	drebrin like(DBNL)	Homo sapiens
DCT	dopachrome tautomerase(DCT)	Homo sapiens
DCXR	dicarbonyl and L-xylulose reductase(DCXR)	Homo sapiens
DDO	D-aspartate oxidase(DDO)	Homo sapiens
DECR1	2,4-dienoyl-CoA reductase 1, mitochondrial(DECR1)	Homo sapiens
DECR2	2,4-dienoyl-CoA reductase 2, peroxisomal(DECR2)	Homo sapiens
DEGS1	delta 4-desaturase, sphingolipid 1(DEGS1)	Homo sapiens
DHCR24	24-dehydrocholesterol reductase(DHCR24)	Homo sapiens
DHCR7	7-dehydrocholesterol reductase(DHCR7)	Homo sapiens
DHDH	dihydrodiol dehydrogenase(DHDH)	Homo sapiens
DHFR	dihydrofolate reductase(DHFR)	Homo sapiens
DHFR2	dihydrofolate reductase 2(DHFR2)	Homo sapiens
DHODH	dihydroorotate dehydrogenase (quinone)(DHODH)	Homo sapiens
DHRS1	dehydrogenase/reductase 1(DHRS1)	Homo sapiens
DHRS12	dehydrogenase/reductase 12(DHRS12)	Homo sapiens
DHRS13	dehydrogenase/reductase 13(DHRS13)	Homo sapiens
DHRS2	dehydrogenase/reductase 2(DHRS2)	Homo sapiens
DHRS3	dehydrogenase/reductase 3(DHRS3)	Homo sapiens
DHRS4	dehydrogenase/reductase 4(DHRS4)	Homo sapiens
DHRS7	dehydrogenase/reductase 7(DHRS7)	Homo sapiens
DHRS7B	dehydrogenase/reductase 7B(DHRS7B)	Homo sapiens
DHRS9	dehydrogenase/reductase 9(DHRS9)	Homo sapiens
DHTKD1	dehydrogenase E1 and transketolase domain containing 1(DHTKD1)	Homo sapiens
DIO1	deiodinase, iodothyronine type I(DIO1)	Homo sapiens
DIO2	deiodinase, iodothyronine type II(DIO2)	Homo sapiens
DIO3	deiodinase, iodothyronine type III(DIO3)	Homo sapiens
DLAT	dihydrolipoamide S-acetyltransferase(DLAT)	Homo sapiens
DLD	dihydrolipoamide dehydrogenase(DLD)	Homo sapiens
DLST	dihydrolipoamide S-succinyltransferase(DLST)	Homo sapiens
DMGDH	dimethylglycine dehydrogenase(DMGDH)	Homo sapiens
DNAJA3	DnaJ heat shock protein family (Hsp40) member A3(DNAJA3)	Homo sapiens
DNAJB11	DnaJ heat shock protein family (Hsp40) member B11(DNAJB11)	Homo sapiens
DNAJB6	DnaJ heat shock protein family (Hsp40) member B6(DNAJB6)	Homo sapiens
DNAJB9	DnaJ heat shock protein family (Hsp40) member B9(DNAJB9)	Homo sapiens
DNAJC10	DnaJ heat shock protein family (Hsp40) member C10(DNAJC10)	Homo sapiens
DNAJC5	DnaJ heat shock protein family (Hsp40) member C5(DNAJC5)	Homo sapiens
DNAJC8	DnaJ heat shock protein family (Hsp40) member C8(DNAJC8)	Homo sapiens
DOHH	deoxyhypusine hydroxylase/monooxygenase(DOHH)	Homo sapiens
DPYD	dihydropyrimidine dehydrogenase(DPYD)	Homo sapiens
DUOX1	dual oxidase 1(DUOX1)	Homo sapiens
DUOX2	dual oxidase 2(DUOX2)	Homo sapiens
DUS1L	dihydrouridine synthase 1 like(DUS1L)	Homo sapiens
DUS2	dihydrouridine synthase 2(DUS2)	Homo sapiens
DUS3L	dihydrouridine synthase 3 like(DUS3L)	Homo sapiens
DUS4L	dihydrouridine synthase 4 like(DUS4L)	Homo sapiens
ECH1	enoyl-CoA hydratase 1(ECH1)	Homo sapiens
ECHS1	enoyl-CoA hydratase, short chain 1(ECHS1)	Homo sapiens
ECSIT	ECSIT signalling integrator(ECSIT)	Homo sapiens
EGLN1	egl-9 family hypoxia inducible factor 1(EGLN1)	Homo sapiens
EGLN2	egl-9 family hypoxia inducible factor 2(EGLN2)	Homo sapiens
EGLN3	egl-9 family hypoxia inducible factor 3(EGLN3)	Homo sapiens
EHHADH	enoyl-CoA hydratase and 3-hydroxyacyl CoA dehydrogenase(EHHADH)	Homo sapiens
ENO1	enolase 1(ENO1)	Homo sapiens
ENO2	enolase 2(ENO2)	Homo sapiens
ENO3	enolase 3(ENO3)	Homo sapiens
ENOX1	ecto-NOX disulfide-thiol exchanger 1(ENOX1)	Homo sapiens
EPM2A	epilepsy, progressive myoclonus type 2A, Lafora disease (laforin)(EPM2A)	Homo sapiens
EPX	eosinophil peroxidase(EPX)	Homo sapiens
ERO1A	endoplasmic reticulum oxidoreductase 1 alpha(ERO1A)	Homo sapiens
ERO1B	endoplasmic reticulum oxidoreductase 1 beta(ERO1B)	Homo sapiens
ETFA	electron transfer flavoprotein alpha subunit(ETFA)	Homo sapiens
ETFB	electron transfer flavoprotein beta subunit(ETFB)	Homo sapiens
ETFDH	electron transfer flavoprotein dehydrogenase(ETFDH)	Homo sapiens
ETHE1	ETHE1, persulfide dioxygenase(ETHE1)	Homo sapiens
FA2H	fatty acid 2-hydroxylase(FA2H)	Homo sapiens
FADS1	fatty acid desaturase 1(FADS1)	Homo sapiens
FADS2	fatty acid desaturase 2(FADS2)	Homo sapiens
FADS3	fatty acid desaturase 3(FADS3)	Homo sapiens
FADS6	fatty acid desaturase 6(FADS6)	Homo sapiens
FAXDC2	fatty acid hydroxylase domain containing 2(FAXDC2)	Homo sapiens
FMO1	flavin containing monooxygenase 1(FMO1)	Homo sapiens
FMO2	flavin containing monooxygenase 2(FMO2)	Homo sapiens
FMO3	flavin containing monooxygenase 3(FMO3)	Homo sapiens
FTH1	ferritin heavy chain 1(FTH1)	Homo sapiens
GCLC	glutamate-cysteine ligase catalytic subunit(GCLC)	Homo sapiens
GCLM	glutamate-cysteine ligase modifier subunit(GCLM)	Homo sapiens
GGT1	gamma-glutamyltransferase 1(GGT1)	Homo sapiens
GLYAT	glycine-N-acyltransferase(GLYAT)	Homo sapiens
GPX2	glutathione peroxidase 2(GPX2)	Homo sapiens
GPX3	glutathione peroxidase 3(GPX3)	Homo sapiens
GPX4	glutathione peroxidase 4(GPX4)	Homo sapiens
GSS	glutathione synthetase(GSS)	Homo sapiens
GSTA2	glutathione S-transferase alpha 2(GSTA2)	Homo sapiens
GSTA3	glutathione S-transferase alpha 3(GSTA3)	Homo sapiens
GSTA4	glutathione S-transferase alpha 4(GSTA4)	Homo sapiens
GSTA5	glutathione S-transferase alpha 5(GSTA5)	Homo sapiens
GSTM1	glutathione S-transferase mu 1(GSTM1)	Homo sapiens
GSTM4	glutathione S-transferase mu 4(GSTM4)	Homo sapiens
GSTM5	glutathione S-transferase mu 5(GSTM5)	Homo sapiens
GSTO1	glutathione S-transferase omega 1(GSTO1)	Homo sapiens
GSTO2	glutathione S-transferase omega 2(GSTO2)	Homo sapiens
GSTP1	glutathione S-transferase pi 1(GSTP1)	Homo sapiens
GSTZ1	glutathione S-transferase zeta 1(GSTZ1)	Homo sapiens
HSPA1A	heat shock protein family A (Hsp70) member 1A(HSPA1A)	Homo sapiens
KEAP1	kelch like ECH associated protein 1(KEAP1)	Homo sapiens
MAT1A	methionine adenosyltransferase 1A(MAT1A)	Homo sapiens
MAT2A	methionine adenosyltransferase 2A(MAT2A)	Homo sapiens
MAT2B	methionine adenosyltransferase 2B(MAT2B)	Homo sapiens
MGST1	microsomal glutathione S-transferase 1(MGST1)	Homo sapiens
MGST2	microsomal glutathione S-transferase 2(MGST2)	Homo sapiens
MGST3	microsomal glutathione S-transferase 3(MGST3)	Homo sapiens
MPO	myeloperoxidase(MPO)	Homo sapiens
MTFR1L	mitochondrial fission regulator 1 like(MTFR1L)	Homo sapiens
MTFR2	mitochondrial fission regulator 2(MTFR2)	Homo sapiens
MTR	5-methyltetrahydrofolate-homocysteine methyltransferase(MTR)	Homo sapiens
NAT1	N-acetyltransferase 1(NAT1)	Homo sapiens
NAT2	N-acetyltransferase 2(NAT2)	Homo sapiens
NCF1	neutrophil cytosolic factor 1(NCF1)	Homo sapiens
NNMT	nicotinamide N-methyltransferase(NNMT)	Homo sapiens
NOX1	NADPH oxidase 1	Homo sapiens
NOX3	NADPH oxidase 3	Homo sapiens
NOX4	NADPH oxidase 4	Homo sapiens
NOXA1	NADPH oxidase activator 1	Homo sapiens
NOXO1	NADPH oxidase organizer 1	Homo sapiens
OPLAH	5-oxoprolinase (ATP-hydrolysing)(OPLAH)	Homo sapiens
PAOX	polyamine oxidase(PAOX)	Homo sapiens
PAPSS1	3'-phosphoadenosine 5'-phosphosulfate synthase 1(PAPSS1)	Homo sapiens
PAPSS2	3'-phosphoadenosine 5'-phosphosulfate synthase 2(PAPSS2)	Homo sapiens
PRDX2	peroxiredoxin 2(PRDX2)	Homo sapiens
PRDX3	peroxiredoxin 3(PRDX3)	Homo sapiens
PRDX5	peroxiredoxin 5(PRDX5)	Homo sapiens
PRXL2A	peroxiredoxin like 2A	Homo sapiens
RIOX1	ribosomal oxygenase 1	Homo sapiens
SELENOS	selenoprotein S(SELENOS)	Homo sapiens
SOD1	superoxide dismutase 1	Homo sapiens
SOD2	superoxide dismutase 2, mitochondrial(SOD2)	Homo sapiens
TXNDC2	thioredoxin domain containing 2(TXNDC2)	Homo sapiens
TXNRD1	thioredoxin reductase 1(TXNRD1)	Homo sapiens
TXNRD2	thioredoxin reductase 2(TXNRD2)	Homo sapiens
